# Supplementary material
Source: ML conference proceedings conference paper supplement (https://proceedings.neurips.cc/paper_files/paper/2021/hash/a18630ab1c3b9f14454cf70dc7114834-Abstract.html)
Supplement: Supplementary file 1 [file a18630ab1c3b9f14454cf70dc7114834-Supplemental.zip]

Archive with 20 entries (20 files):
- BZSL/Bayesian_GZSL.m
- BZSL/calculate_priors.m
- BZSL/check_for_tie.m
- BZSL/Demo.m
- BZSL/hyperparameter_setting.m
- BZSL/hyperparameter_tuning.m
- BZSL/load_tuned_params.m
- BZSL/README.md
- BZSL/split_data.m
- BZSL/tuning_split.m
- BZSL/unconstrained_estimation.m
- BZSL/unconstrained_prediction.m
- DNA Embeddings/.ipynb_checkpoints/DNA_embedddings_INSECT-checkpoint.ipynb
- DNA Embeddings/.ipynb_checkpoints/DNA_embeddings_CUB-checkpoint.ipynb
- DNA Embeddings/DNA_embedddings_INSECT.ipynb
- DNA Embeddings/DNA_embeddings_CUB.ipynb
- DNA Embeddings/README.md
- DNA Embeddings/requirements.txt
- NIPS_2021_Supplementary_Materials.pdf
- README.md
