# Supplementary material
Source: ML conference proceedings conference paper supplement (https://proceedings.neurips.cc/paper_files/paper/2021/hash/a18630ab1c3b9f14454cf70dc7114834-Abstract.html)
Supplement: Supplementary file 1 [file a18630ab1c3b9f14454cf70dc7114834-Supplemental.zip › BZSL/calculate_priors.m]

% This function calculates the prior mean and prior covarince in advance to
% feed in BZSL
function [mu_0, scatter] = calculate_priors(Data, labels, varargin)
    
    
    [~, dim]    = size(Data);
    uy          = unique(labels);
    nc          = length(uy);
    if strcmp(varargin{2}, 'constrained')
        class_means = zeros(nc,dim);
        for j=1:length(uy)
            class_means(j,:) = mean(Data(labels==uy(j),:),1);
        end  
        mu_0        = mean(class_means,1);
        scatter     = 0;
    else
        scatters    = zeros(dim,dim,nc);
        class_means = zeros(nc,dim);
        for j=1:length(uy)
            scatters(:,:,j)  = cov(Data(labels==uy(j),:));
            class_means(j,:) = mean(Data(labels==uy(j),:),1);
        end  
        scatter     = mean(scatters,3);
        mu_0        = mean(class_means,1);
    end
end
