# Supplementary material
Source: ML conference proceedings conference paper supplement (https://proceedings.neurips.cc/paper_files/paper/2021/hash/a18630ab1c3b9f14454cf70dc7114834-Abstract.html)
Supplement: Supplementary file 1 [file a18630ab1c3b9f14454cf70dc7114834-Supplemental.zip › DNA Embeddings/requirements.txt]

# This file may be used to create an environment using:
# $ conda create --name <env> --file <this file>
tensorflow=2.1.0
numpy=1.19.2 
python=3.7.10 
scipy=1.6.1 
jupyter notebook
