# Supplementary material
Source: ML conference proceedings conference paper supplement (https://proceedings.neurips.cc/paper_files/paper/2021/hash/a18630ab1c3b9f14454cf70dc7114834-Abstract.html)
Supplement: Supplementary file 1 [file a18630ab1c3b9f14454cf70dc7114834-Supplemental.zip › README.md]

# Fine-grained ZSL with DNA as Side Information.

Please see the ReadMe files inside of the relevant folders for the instructions to run codes.
